# Supplementary material for: Socialized into Knowing: Gender Differences in Children's Knowledge of Parental Backgrounds as Early Relational Labor Across 45 Nations
Source: Research Square preprint supplement (doi:10.21203/rs.3.rs-8541982/v1), 2026-01-19
Supplement: Supplementary file 1 [file 67960209738807dfecc03a8a.docx]

**Supplementary Material for the paper**

*Socialized into Knowing: Gender Differences in Children's Knowledge of Parental Backgrounds as Early Relational Labor Across 45 Nations*

**Contents**

Supplementary Table 1

Supplementary Table 2

**Supplementary Table 1.** Effect estimates with standard errors. TIMSS data.

|  | % Correct | | | | | Girls vs boys | | | | Mothers | |
| --- | --- | --- | --- | --- | --- | --- | --- | --- | --- | --- | --- |
| National | Father | | | Mother | | Log-odds | SE | Log-odds | SE | vs fathers | |
| sample | Girl | | Boy | Girl | Boy | Mother |  | Father |  | Log-odds | SE |
| Armenia | | 71 | 69 | 70 | 68 | 0.08 | 0.08 | 0.13 | 0.08 | -.09 | .09 |
| Australia | | 88 | 88 | 93 | 90 | 0.39 | 0.21 | 0.06 | 0.20 | .94 | .13 |
| Bahrain | | 84 | 82 | 85 | 81 | 0.28 | 0.09 | 0.12 | 0.08 | .15 | .09 |
| Belgium | | 93 | 91 | 95 | 92 | 0.43 | 0.13 | 0.17 | 0.11 | .35 | .11 |
| Bulgaria | | 96 | 96 | 97 | 96 | 0.29 | 0.20 | -0.01 | 0.17 | .51 | .16 |
| Canada | | 86 | 86 | 89 | 87 | 0.21 | 0.08 | 0.00 | 0.09 | .48 | .06 |
| Chile | | 92 | 92 | 95 | 94 | 0.28 | 0.16 | -0.02 | 0.12 | .86 | .13 |
| Croatia | | 90 | 88 | 91 | 90 | 0.14 | 0.16 | 0.16 | 0.13 | .30 | .10 |
| Cyprus | | 95 | 94 | 96 | 95 | 0.32 | 0.17 | 0.20 | 0.17 | .05 | .12 |
| Czechia | | 95 | 94 | 97 | 96 | 0.28 | 0.15 | 0.12 | 0.13 | .86 | .14 |
| Denmark | | 96 | 95 | 97 | 96 | 0.50 | 0.24 | 0.26 | 0.20 | .50 | .17 |
| Finland | | 96 | 96 | 98 | 97 | 0.34 | 0.21 | -0.03 | 0.17 | .59 | .14 |
| France | | 89 | 87 | 91 | 89 | 0.24 | 0.12 | 0.16 | 0.10 | .53 | .09 |
| Georgia | | 86 | 84 | 86 | 84 | 0.18 | 0.10 | 0.21 | 0.11 | -.06 | .11 |
| Germany | | 84 | 85 | 85 | 87 | -0.15 | 0.13 | -0.09 | 0.11 | .40 | .16 |
| Hong Kong | | 77 | 76 | 81 | 78 | 0.16 | 0.13 | 0.07 | 0.09 | .41 | .08 |
| Hungary | | 96 | 95 | 97 | 96 | 0.13 | 0.17 | 0.16 | 0.14 | .67 | .15 |
| Indonesia | | 87 | 85 | 88 | 87 | 0.09 | 0.12 | 0.16 | 0.11 | .41 | .13 |
| Iran | | 82 | 80 | 83 | 79 | 0.23 | 0.15 | 0.13 | 0.17 | .26 | .12 |
| Ireland | | 94 | 92 | 95 | 93 | 0.52 | 0.16 | 0.22 | 0.14 | .47 | .12 |
| Italy | | 92 | 93 | 93 | 93 | -0.08 | 0.14 | -0.19 | 0.14 | .34 | .12 |
| Japan | | 97 | 96 | 99 | 98 | 0.68 | 0.30 | 0.29 | 0.17 | 1.70 | .26 |
| Kazakhstan | | 84 | 80 | 84 | 82 | 0.15 | 0.09 | 0.28 | 0.09 | .33 | .08 |
| Kuwait | | 79 | 80 | 80 | 80 | 0.00 | 0.20 | -0.03 | 0.13 | .08 | .09 |
| Lithuania | | 95 | 93 | 96 | 94 | 0.49 | 0.17 | 0.33 | 0.14 | .52 | .10 |
| Morocco | | 87 | 85 | 87 | 88 | -0.03 | 0.10 | 0.17 | 0.11 | .22 | .08 |
| New Zealand | | 88 | 87 | 92 | 89 | 0.32 | 0.17 | 0.16 | 0.13 | .63 | .11 |
| N. Ireland | | 92 | 88 | 93 | 92 | 0.03 | 0.15 | 0.46 | 0.19 | .46 | .14 |
| Norway gr4 | | 94 | 93 | 96 | 92 | 0.63 | 0.24 | 0.23 | 0.20 | .26 | .19 |
| Norway gr5 | | 96 | 96 | 95 | 97 | -0.41 | 0.33 | -0.07 | 0.28 | .14 | .21 |
| Oman | | 83 | 81 | 82 | 81 | 0.09 | 0.07 | 0.12 | 0.07 | -.01 | .06 |
| Portugal | | 95 | 93 | 95 | 95 | 0.01 | 0.14 | 0.24 | 0.14 | .41 | .11 |
| Qatar | | 78 | 77 | 78 | 76 | 0.16 | 0.11 | 0.06 | 0.09 | -.06 | .08 |
| Russia | | 88 | 86 | 92 | 90 | 0.22 | 0.09 | 0.11 | 0.11 | .69 | .09 |
| Saudi Arabia | | 81 | 76 | 82 | 76 | 0.37 | 0.13 | 0.32 | 0.14 | .06 | .09 |
| Serbia | | 93 | 92 | 93 | 92 | 0.11 | 0.14 | 0.08 | 0.14 | .14 | .10 |
| Singapore | | 91 | 86 | 92 | 88 | 0.45 | 0.09 | 0.52 | 0.09 | .34 | .08 |
| Slovakia | | 91 | 90 | 93 | 92 | 0.13 | 0.12 | 0.14 | 0.10 | .61 | .11 |
| Slovenia | | 93 | 93 | 94 | 94 | 0.06 | 0.20 | 0.00 | 0.17 | .29 | .14 |
| South Korea | | 99 | 97 | 98 | 98 | 0.33 | 0.22 | 0.68 | 0.25 | .16 | .23 |
| Spain | | 92 | 93 | 93 | 94 | -0.09 | 0.13 | -0.13 | 0.14 | .21 | .09 |
| Sweden | | 96 | 96 | 97 | 97 | 0.10 | 0.26 | -0.01 | 0.22 | .45 | .17 |
| Taiwan | | 81 | 77 | 80 | 75 | 0.33 | 0.08 | 0.28 | 0.08 | -.50 | .13 |
| Turkey | | 88 | 89 | 88 | 89 | -0.04 | 0.08 | -0.19 | 0.08 | -.02 | .10 |
| UAE | | 81 | 80 | 81 | 78 | 0.14 | 0.08 | 0.07 | 0.07 | -.05 | .04 |

**Supplementary Table 2.** Effect estimates with standard errors. PISA data.

|  | % Correct | | | | Girls vs boys | | | | Mothers | |
| --- | --- | --- | --- | --- | --- | --- | --- | --- | --- | --- |
| National | Father | | Mother | | Log-odds | SE | Log-odds | SE | vs fathers | |
| sample | Girl | Boy | Girl | Boy | Mother |  | Father |  | Log-odds | SE |
| Bulgaria | 74 | 67 | 75 | 70 | .25 | .09 | .32 | .08 | .07 | .06 |
| Chile | 72 | 67 | 76 | 70 | .29 | .06 | .24 | .07 | .22 | .05 |
| Colombia | 69 | 65 | 71 | 64 | .29 | .08 | .18 | .08 | .08 | .06 |
| Croatia | 50 | 48 | 49 | 45 | .28 | .05 | .18 | .04 | .39 | .04 |
| Denmark | 54 | 49 | 56 | 51 | .20 | .05 | .17 | .06 | .13 | .04 |
| Germany | 83 | 82 | 83 | 82 | .15 | .05 | .07 | .05 | -.06 | .04 |
| Hong Kong | 64 | 59 | 71 | 65 | .11 | .06 | .08 | .07 | .05 | .05 |
| Hungary | 67 | 66 | 75 | 72 | .12 | .07 | .04 | .08 | .50 | .06 |
| Iceland | 59 | 59 | 68 | 58 | .42 | .09 | .00 | .09 | .22 | .07 |
| Italy | 70 | 64 | 69 | 62 | .29 | .03 | .28 | .03 | -.11 | .02 |
| Korea | 69 | 65 | 68 | 66 | .53 | .06 | .33 | .08 | -.02 | .04 |
| Lithuania | 75 | 68 | 80 | 70 | .08 | .07 | .17 | .07 | .25 | .06 |
| Luxembourg | 54 | 50 | 52 | 50 | .28 | .05 | .28 | .05 | -.04 | .07 |
| Macao | 77 | 72 | 79 | 75 | .27 | .06 | .10 | .06 | .25 | .04 |
| New Zealand | 56 | 54 | 56 | 49 | .28 | .12 | .07 | .12 | -.10 | .04 |
| Panama | 54 | 52 | 62 | 56 | .52 | .05 | .31 | .05 | .31 | .07 |
| Poland | 82 | 77 | 86 | 78 | .33 | .04 | .23 | .04 | .21 | .04 |
| Portugal | 70 | 65 | 73 | 66 | .50 | .04 | .32 | .04 | .23 | .04 |
| Qatar | 70 | 63 | 70 | 59 | .11 | .05 | .18 | .05 | -.09 | .04 |
| Turkey | 85 | 85 | 87 | 85 | .19 | .09 | .05 | .10 | .04 | .08 |
